# Supplementary material for: An insight into the reaction mechanism of CO2 photoreduction catalyzed by atomically dispersed Fe atoms supported on graphitic carbon nitride
Source: Royal Society of Chemistry journal article supplement (doi:10.1039/d0cp05570k), 2021-01-01
Supplement: d0cp05570k1.pdf [file d0cp05570k1.pdf]

## Supporting Information for

### **An insight into the reaction mechanism of CO<sub>2</sub> photoreduction catalyzed by atomically dispersed Fe atoms supported on graphitic carbon nitride**

Zhengyan Zhao, Wei Liu, Yantao Shi\*, Heming Zhang, Xuedan Song, Wenzhe Shang, Ce Hao\**State Key Laboratory of Fine Chemicals, School of Chemical Engineering, Dalian University of Technology, Dalian, 116024, China*

**\*Corresponding authors.**

*E-mail address: shiyantao@dlut.edu.cn (Y. Shi); haoce@dlut.edu.cn (C. Hao)*

#### **The formulas of the rate constants involved in the photophysical and photochemical processes**

The rate constant of the fluorescence emission ( $k_F$ )<sup>1</sup> can be calculated by the integration of the emission spectra based on Fermi's golden rule and the time-dependent perturbation theory,

$$k_F(T) = \int \sigma_{em}(\omega, T) d\omega$$

the  $\sigma_{em}(\omega, T)$  is written as<sup>1-2</sup>

$$\sigma_{em}(\omega, T) = \frac{4\omega^3}{3\hbar c^3} \sum_{u,v} P_{iv}(T) |\langle \theta_{fu} | \mu_{fi} | \theta_{iv} \rangle|^2 \delta(\omega_{iv, fu} - \omega)$$

The rate constants of IC<sup>3</sup> and ISC<sup>4</sup> are calculated as follows:

$$k_{IC} = \frac{2\pi}{\hbar} \sum_{u,v} P_{iv}(T) \left| \sum_n \langle \Phi_f | \hat{P}_n | \Phi_i \rangle \langle \Theta_{fu} | \hat{P}_n | \Theta_{iv} \rangle \right|^2 \delta(E_{iv} - E_{fu})$$

$$k_{ISC} = \frac{2\pi}{\hbar} \sum_{u,v} P_{iv}(T) |\langle \Phi_f | \hat{H}^{SO} | \Phi_i \rangle|^2 |\langle \Theta_{fu} | \Theta_{iv} \rangle|^2 \delta(E_{iv} - E_{fu})$$

where  $\omega$  is the circular frequency;  $T$  is the temperature;  $\hbar$  is the reduced Planck constant;  $c$  is the speed of light in vacuum;  $v$  and  $u$  are the vibrational quantum numbers of the initial state and the final state, respectively;  $P_{iv}$  is the Boltzmann distribution of the initial vibronic manifold;  $\Theta$  is the vibrational wavefunction;  $i$  and  $f$  are the initial and the final state, respectively;  $\mu_{fi}$  is the electric transition dipole moment from the initial electronic state to the final electronic state; and  $\delta$  is the Dirac operator;  $\Phi$  is the electronic state;  $\hat{P}_n$  indicates the momentum operator of the  $n$ th normal vibrational mode in the final state;  $n$  is the index of normal vibrational modes;  $E$  represents the energy; and  $\hat{H}^{SO}$  denotes the Hamiltonian operator of spin-orbit coupling.

The reaction rate constant  $k_R$  of the photochemical process is calculated based on the transition state theory:

$$k_R = k_i \frac{k_B T}{h} \exp\left(-\frac{\Delta G^\ddagger}{RT}\right)$$

$$k_i = 1 + \frac{1}{24} \left(\frac{\hbar \nu_i}{k_B T}\right)^2$$

where  $k_B$  is the Boltzmann constant,  $\Delta G^\ddagger$  is the Gibbs free energy, namely the difference in energies between the transition state and the reactant complex;  $R$  is the ideal gas constant;  $k_i$  is the transmission coefficient; and  $\nu_i$  is the imaginary frequency of the transition state.

**Table S1** The blank experiments of CO<sub>2</sub> photoreduction.

|   | Catalyst                        | Medium | Atmosphere      | Irradiation time | CO   |
|---|---------------------------------|--------|-----------------|------------------|------|
| 1 | g-C <sub>3</sub> N <sub>4</sub> | water  | Ar              | 10 h             | None |
| 2 | g-C <sub>3</sub> N <sub>4</sub> | water  | CO <sub>2</sub> | Dark             | None |
| 3 | None                            | water  | CO <sub>2</sub> | 10 h             | None |

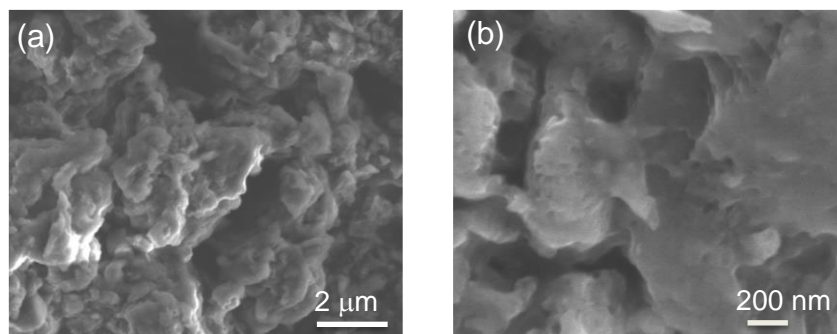**Fig. S1** (a) (b) Scanning electron microscopy images of Fe-g-C<sub>3</sub>N<sub>4</sub>.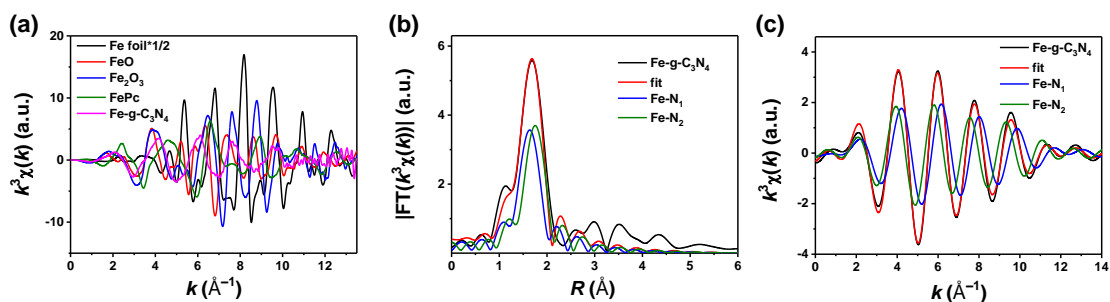**Fig. S2** (a) Fe K-edge  $k^3$ -weighted EXAFS oscillations  $k^3\chi(k)$  of Fe-g-C<sub>3</sub>N<sub>4</sub> sample. The data of Fe foil, FeO, Fe<sub>2</sub>O<sub>3</sub> and FePc are shown for reference (b) The fitting curves of  $k^3$ -weighted EXAFS spectra and (c)  $k^3\chi(k)$  oscillations of Fe-g-C<sub>3</sub>N<sub>4</sub> sample using the ARTEMIS module of IFEFFIT.**Table S2** EXAFS fitting results for Fe-g-C<sub>3</sub>N<sub>4</sub> sample using the ARTEMIS module of IFEFFIT.

| Sample                             | Path              | $N$ | $R$ (Å) | $\sigma^2$ ( $10^{-3}\text{Å}^2$ ) | $\Delta E_0$ (eV) | $R$ -factor |
|------------------------------------|-------------------|-----|---------|------------------------------------|-------------------|-------------|
| Fe-g-C <sub>3</sub> N <sub>4</sub> | Fe-N <sub>1</sub> | 2.0 | 2.08    | 2.3                                | 6.0               | 0.001       |
|                                    | Fe-N <sub>2</sub> | 2.2 | 2.19    | 2.3                                | 6.0               |             |

$N$ ,  $R$ ,  $\sigma^2$ , and  $\Delta E_0$  are the coordination number, interatomic distance, Debye–Waller factor, and shift in the edge energy.

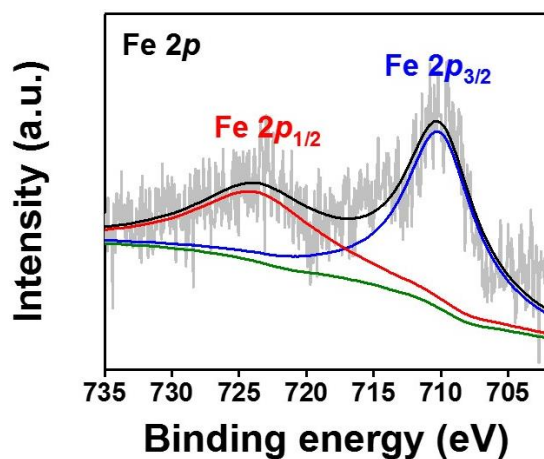

Fig. S3 Fe 2p XPS spectra of Fe-g-C<sub>3</sub>N<sub>4</sub>.

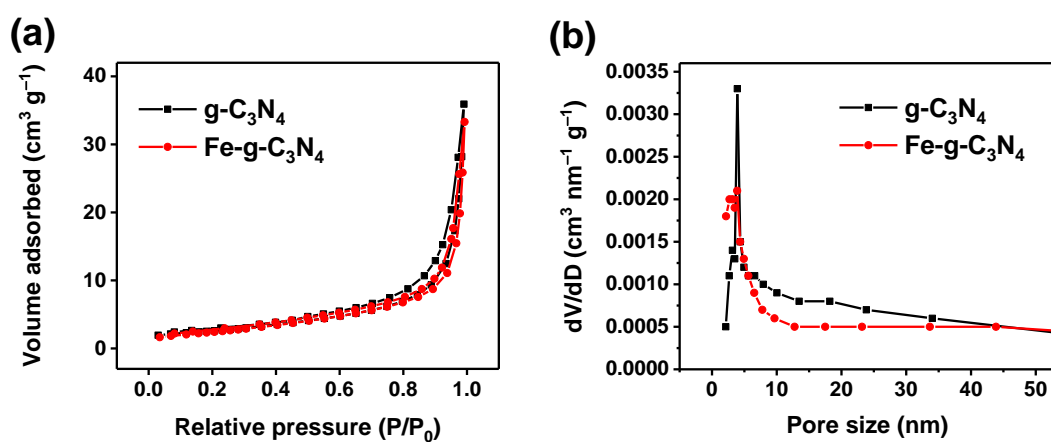

Fig. S4 (a) N<sub>2</sub> adsorption-desorption isotherms and (b) Barrett-Joyner-Halenda (BJH) pore size distribution curves of g-C<sub>3</sub>N<sub>4</sub> and Fe-g-C<sub>3</sub>N<sub>4</sub> samples

Table S3 The BET surface areas, total pore volumes, and pore size of g-C<sub>3</sub>N<sub>4</sub> and Fe-g-C<sub>3</sub>N<sub>4</sub> samples.

|                                                      | g-C <sub>3</sub> N <sub>4</sub> | Fe-g-C <sub>3</sub> N <sub>4</sub> |
|------------------------------------------------------|---------------------------------|------------------------------------|
| $S_{\text{BET}}$ (m <sup>2</sup> g <sup>-1</sup> )   | 9.17                            | 9.07                               |
| $V_{\text{pore}}$ (cm <sup>3</sup> g <sup>-1</sup> ) | 0.06                            | 0.05                               |
| Pore size (nm)                                       | 17.31                           | 16.03                              |

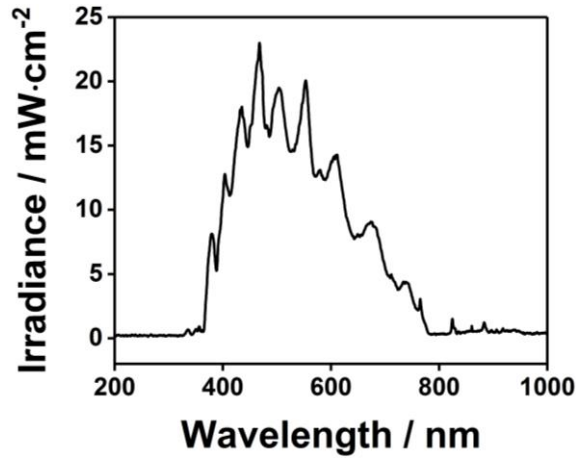

Fig. S5 Spectrum of the 300 W xenon lamp used in this work.

The calculation of quantum efficiency of CO<sub>2</sub> reduction is given as follows. A fiber optic spectrometer (CEL-P4000, Ceaulight) was used for light source spectrum. The light intensity was characterized by an optical power meter (CEL-NP2000, Ceaulight, Beijing). The irradiated area for the reaction is 35.26 cm<sup>2</sup> (6.7 cm radius). The calculation of the apparent quantum yield (AQY) is defined as:

$$\text{AQY}(\%) = \frac{2 \times \text{the number of produced CO molecules}}{\text{the number of incident photons}} \times 100\% = \frac{Ne}{Nq}$$

$$Ne = 2 \times N_A \times n$$

$$Nq = S \times t \times \int_{200}^{1000} Nd\lambda$$

$$N = \frac{P \times \lambda}{h \times c}$$

$Ne$  is the total number of transfer electrons in the reaction,  $N_A$  is the Avogadro constant ( $6.02 \times 10^{23} \text{ mol}^{-1}$ ),  $n$  (in mol) is the amount of products produced by 1 g photocatalyst.  $Nq$  is the number of integrated photons with a wavelength from 200 nm to 1000 nm,  $S$  is the irradiation area,  $t$  is the photo-irradiation time (s),  $N$  is the number of incident photons,  $P$  is the irradiation energy,  $\lambda$  is the wavelength (nm),  $h$  is the planck constant ( $h = 6.626 \times 10^{-34} \text{ J}\cdot\text{s}$ ),  $c$  is the speed of light ( $c = 3 \times 10^8 \text{ m}\cdot\text{s}^{-1}$ ). The calculated

AQY of  $g\text{-C}_3\text{N}_4$  and  $\text{Fe-}g\text{-C}_3\text{N}_4$  are  $2.0 \times 10^{-5}\%$  and  $3.8 \times 10^{-5}\%$ , respectively.

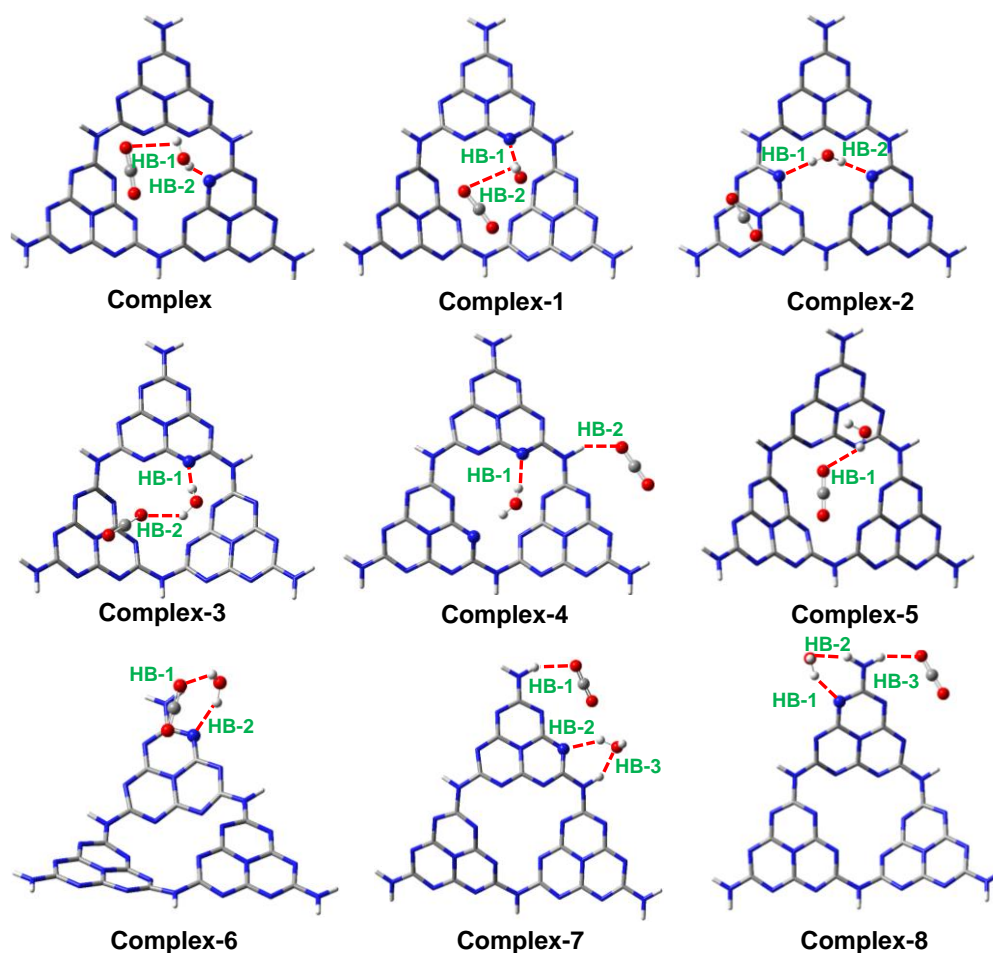

**Fig. S6**  $g\text{-C}_3\text{N}_4$ ,  $\text{CO}_2$  and  $\text{H}_2\text{O}$  formed different hydrogen-bonded complexes at different binding sites, the optimized structures of the nine hydrogen-bonded complexes were given.

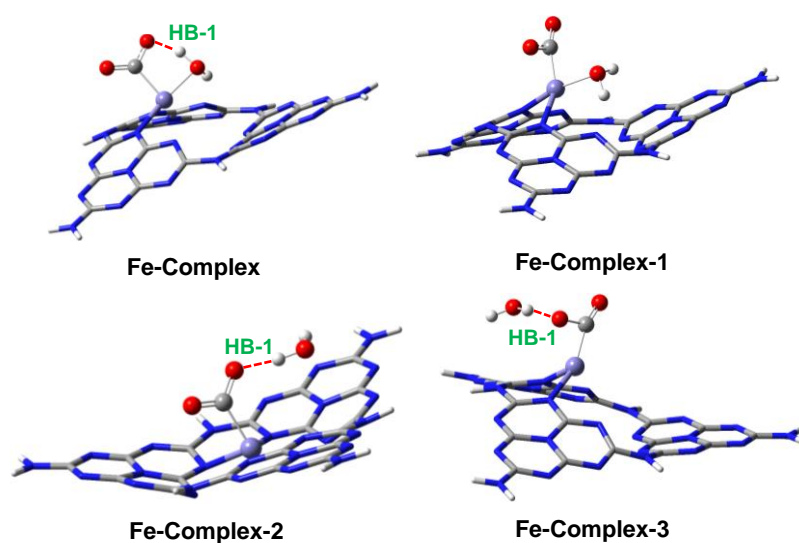

**Fig. S7**  $\text{Fe-}g\text{-C}_3\text{N}_4$ ,  $\text{CO}_2$  and  $\text{H}_2\text{O}$  formed different hydrogen-bonded complexes at different binding sites, the optimized structures of the four hydrogen-bonded complexes were given.

**Table S4** The relative energies of the different hydrogen-bonded complexes.

| Structures | Relative energies (kal/mol) | Structures   | Relative energies (kal/mol) |
|------------|-----------------------------|--------------|-----------------------------|
| Complex    | 0.0                         | Fe-Complex   | 0                           |
| Complex-1  | 0.4                         | Fe-Complex-1 | 5.6                         |
| Complex-2  | 2.2                         | Fe-Complex-2 | 14.5                        |
| Complex-3  | 2.4                         | Fe-Complex-3 | 16.4                        |
| Complex-4  | 3.8                         |              |                             |
| Complex-5  | 4.6                         |              |                             |
| Complex-6  | 5.9                         |              |                             |
| Complex-7  | 6.8                         |              |                             |
| Complex-8  | 8.5                         |              |                             |

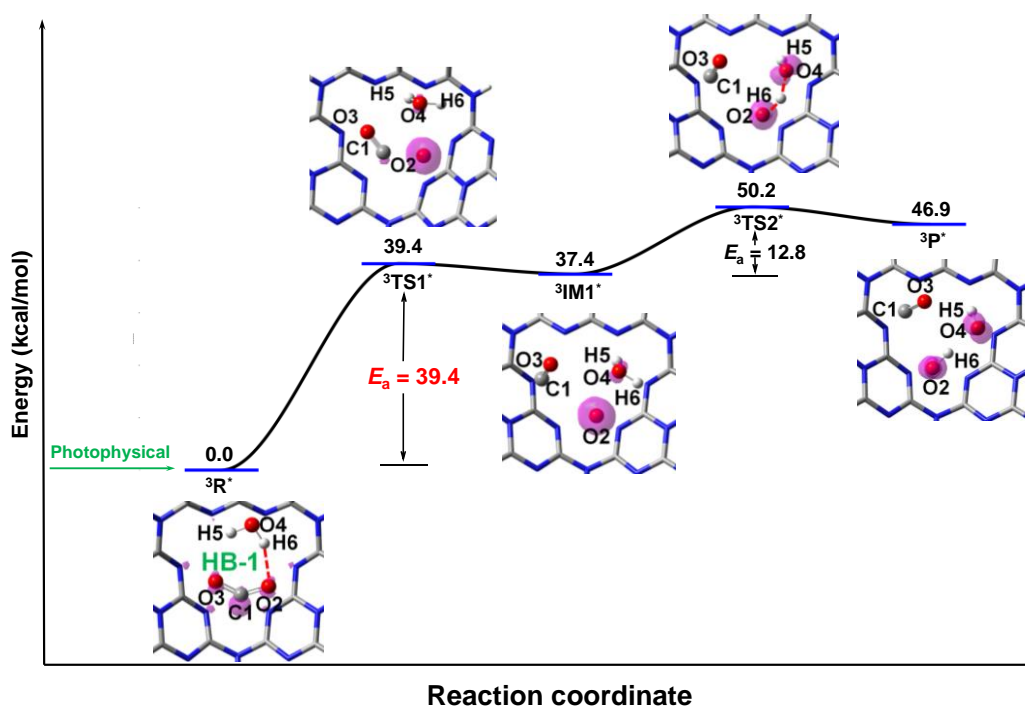

**Fig. S8** The photochemical reaction path (Path-2) of CO<sub>2</sub> reduction for Complex.

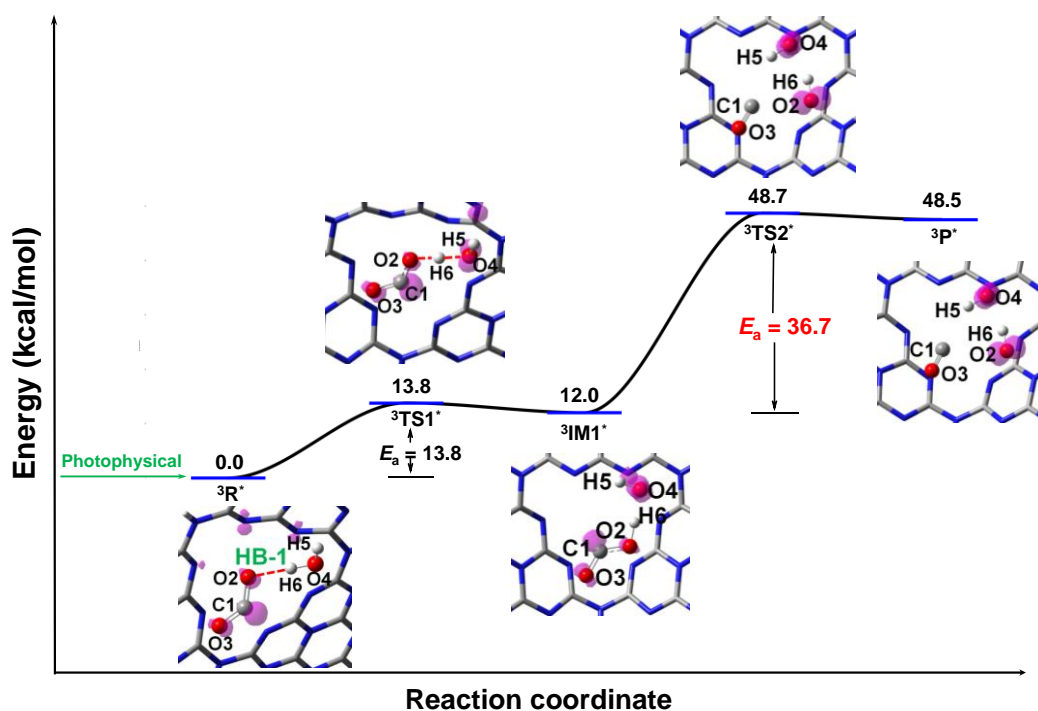

Fig. S9 The photochemical reaction path (Path-3) of CO<sub>2</sub> reduction for Complex.

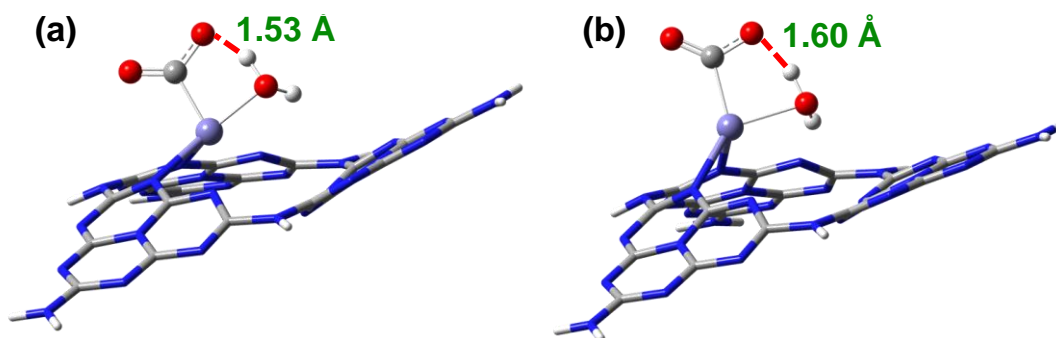

Fig. S10 The optimized structures of Fe-Complex in the (a) triplet state and (b) quintet state.

Table S5 The relative energies of the structures for Fe-Complex in the triplet and quintet states. (unit: kcal/mol).

|                   | Triplet state | Quintet state |
|-------------------|---------------|---------------|
| Relative energies | 9.75          | 0.00          |



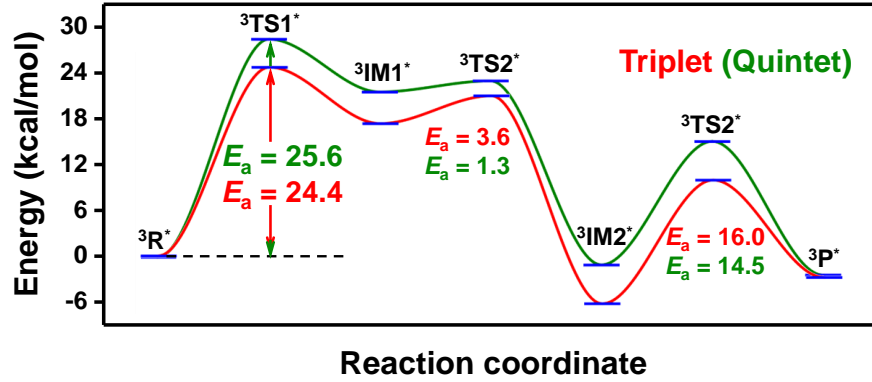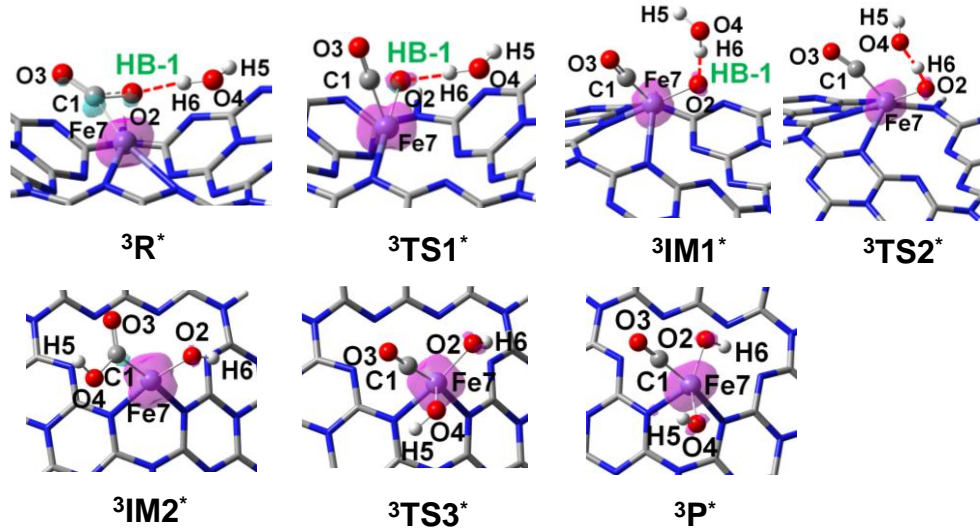

**Fig. S11** The photochemical reaction path (Path-2) of CO<sub>2</sub> reduction for Fe-Complex in the triplet (red) and quintet (green) states.

**The reaction order is derived as follows:**

The total reaction rate is determined by the rate of the rate-limiting step:

$$r = -dc(^3[g-C_3N_4 \cdots OH \cdots H_2O-C(=O)O]^{*})/dt = k_5 c(^3[g-C_3N_4 \cdots OH \cdots H_2O-C(=O)O]^{*}) \quad (1)$$

For the absorption equilibrium formed by CO<sub>2</sub>, H<sub>2</sub>O and the catalyst:

$$K_1 = k_1/k_{-1} = c(^1[g-C_3N_4 \cdots H_2O \cdots O=C=O])/c(^1[g-C_3N_4]) c(H_2O) c(CO_2) \quad (2)$$

For the equilibrium between  $^1[g-C_3N_4 \cdots H_2O \cdots O=C=O]^{*}$  and  $^1[g-C_3N_4 \cdots H_2O \cdots O=C=O]$ :

$$K_2 = c(^1[g-C_3N_4 \cdots H_2O \cdots O=C=O]^{*})/c(^1[g-C_3N_4 \cdots H_2O \cdots O=C=O])$$

$$\text{Then, } c(^1[g-C_3N_4 \cdots H_2O \cdots O=C=O]^{*}) = K_1 K_2 c(^1[g-C_3N_4]) c(H_2O) c(CO_2) \quad (3)$$

For  $^3[g-C_3N_4 \cdots H_2O \cdots O=C(=O)O]^{*}$ :

$$dc(^3[\text{g-C}_3\text{N}_4^+ \cdots \text{H}_2\text{O} \cdots \text{O}=\overset{\cdot}{\text{C}}=\text{O}^-]^*)/dt = k_2 c(^1[\text{g-C}_3\text{N}_4 \cdots \text{H}_2\text{O} \cdots \text{O}=\text{C}=\text{O}]^*) - k_3 c(^3[\text{g-C}_3\text{N}_4^+ \cdots \text{H}_2\text{O} \cdots \text{O}=\overset{\cdot}{\text{C}}=\text{O}^-]^*) = 0$$

$$\text{Then, } k_2 c(^1[\text{g-C}_3\text{N}_4 \cdots \text{H}_2\text{O} \cdots \text{O}=\text{C}=\text{O}]^*) = k_3 c(^3[\text{g-C}_3\text{N}_4^+ \cdots \text{H}_2\text{O} \cdots \text{O}=\overset{\cdot}{\text{C}}=\text{O}^-]^*) \quad (4)$$

For  $^3[\text{g-C}_3\text{N}_4\text{-H}^{\delta+} \cdots \text{OH} \cdots \text{O}=\overset{\cdot}{\text{C}}=\text{O}^{\delta-}]^*$ :

$$dc(^3[\text{g-C}_3\text{N}_4\text{-H}^{\delta+} \cdots \text{OH} \cdots \text{O}=\overset{\cdot}{\text{C}}=\text{O}^{\delta-}]^*)/dt = k_3 c(^3[\text{g-C}_3\text{N}_4^+ \cdots \text{H}_2\text{O} \cdots \text{O}=\overset{\cdot}{\text{C}}=\text{O}^-]^*) - k_4 c(^3[\text{g-C}_3\text{N}_4\text{-H}^{\delta+} \cdots \text{OH} \cdots \text{O}=\overset{\cdot}{\text{C}}=\text{O}^{\delta-}]^*) = 0$$

$$\text{Then } k_3 c(^3[\text{g-C}_3\text{N}_4^+ \cdots \text{H}_2\text{O} \cdots \text{O}=\overset{\cdot}{\text{C}}=\text{O}^-]^*) = k_4 c(^3[\text{g-C}_3\text{N}_4\text{-H}^{\delta+} \cdots \text{OH} \cdots \text{O}=\overset{\cdot}{\text{C}}=\text{O}^{\delta-}]^*) \quad (5)$$

For  $^3[\text{g-C}_3\text{N}_4 \cdots \text{OH} \cdots \text{H} \backslash \text{O}-\overset{\cdot}{\text{C}}=\text{O}]^*$ :

$$dc(^3[\text{g-C}_3\text{N}_4 \cdots \text{OH} \cdots \text{H} \backslash \text{O}-\overset{\cdot}{\text{C}}=\text{O}]^*)/dt = k_4 c(^3[\text{g-C}_3\text{N}_4\text{-H}^{\delta+} \cdots \text{OH} \cdots \text{O}=\overset{\cdot}{\text{C}}=\text{O}^{\delta-}]^*) - k_5 c(^3[\text{g-C}_3\text{N}_4 \cdots \text{OH} \cdots \text{H} \backslash \text{O}-\overset{\cdot}{\text{C}}=\text{O}]^*) = 0$$

$$\text{Then, } k_4 c(^3[\text{g-C}_3\text{N}_4\text{-H}^{\delta+} \cdots \text{OH} \cdots \text{O}=\overset{\cdot}{\text{C}}=\text{O}^{\delta-}]^*) = k_5 c(^3[\text{g-C}_3\text{N}_4 \cdots \text{OH} \cdots \text{H} \backslash \text{O}-\overset{\cdot}{\text{C}}=\text{O}]^*) \quad (6)$$

Combining (4), (5) and (6),

$$k_5 c(^3[\text{g-C}_3\text{N}_4 \cdots \text{OH} \cdots \text{H} \backslash \text{O}-\overset{\cdot}{\text{C}}=\text{O}]^*) = k_2 c(^1[\text{g-C}_3\text{N}_4 \cdots \text{H}_2\text{O} \cdots \text{O}=\text{C}=\text{O}]^*) \quad (7)$$

Substitute (3) into (7):

$$k_5 c(^3[\text{g-C}_3\text{N}_4 \cdots \text{OH} \cdots \text{H} \backslash \text{O}-\overset{\cdot}{\text{C}}=\text{O}]^*) = k_2 K_1 K_2 c(^1[\text{g-C}_3\text{N}_4] c(\text{H}_2\text{O}) c(\text{CO}_2)) \quad (8)$$

For  $^3[\text{g-C}_3\text{N}_4 \cdots 2\text{OH} \cdots \text{CO}]^*$ :

$$dc(^3[\text{g-C}_3\text{N}_4 \cdots 2\text{OH} \cdots \text{CO}]^*)/dt = k_5 c(^3[\text{g-C}_3\text{N}_4 \cdots \text{OH} \cdots \text{H} \backslash \text{O}-\overset{\cdot}{\text{C}}=\text{O}]^*) - k_6 c(^3[\text{g-C}_3\text{N}_4 \cdots 2\text{OH} \cdots \text{CO}]^*) + k_{-6} c(^3[\text{g-C}_3\text{N}_4] c(\text{OH})^2 c(\text{CO})) = 0$$

$$\text{Then, } k_5 c(^3[\text{g-C}_3\text{N}_4 \cdots \text{OH} \cdots \text{H} \backslash \text{O}-\overset{\cdot}{\text{C}}=\text{O}]^*) = k_6 c(^3[\text{g-C}_3\text{N}_4 \cdots 2\text{OH} \cdots \text{CO}]^*) - k_{-6} c(^3[\text{g-C}_3\text{N}_4] c(\text{OH})^2 c(\text{CO})) \quad (9)$$

For the desorption of the product CO:

$$K_6 = c(^3[\text{g-C}_3\text{N}_4] c(\text{OH})^2 c(\text{CO})) / c(^3[\text{g-C}_3\text{N}_4 \cdots 2\text{OH} \cdots \text{CO}]^*) \quad (10)$$

Substitute (10) into (9):

$$k_5 c(^3\text{g-C}_3\text{N}_4 \cdots \text{OH} \cdots \text{H} \backslash \text{O} - \dot{\text{C}} = \text{O})^* = (k_6/K_6 - k_{-6}) c(^3\text{g-C}_3\text{N}_4^*) c(\text{OH}\cdot)^2 c(\text{CO}) \quad (11)$$

For  $^1\text{g-C}_3\text{N}_4$  :

$$\begin{aligned} -dc(^1\text{g-C}_3\text{N}_4)/dt &= k_1 c(^1\text{g-C}_3\text{N}_4) c(\text{H}_2\text{O}) c(\text{CO}_2) \\ &\quad - k_{-1} c(^1\text{g-C}_3\text{N}_4 \cdots \text{H}_2\text{O} \cdots \text{CO}_2) + k_7 c(^3\text{g-C}_3\text{N}_4^*) = 0 \end{aligned}$$

Then,

$$k_7 c(^3\text{g-C}_3\text{N}_4^*) = -k_1 c(^1\text{g-C}_3\text{N}_4) c(\text{H}_2\text{O}) c(\text{CO}_2) + k_{-1} c(^1\text{g-C}_3\text{N}_4 \cdots \text{H}_2\text{O} \cdots \text{CO}_2) \quad (12)$$

Substitute (2) into (12):

$$k_7 c(^3\text{g-C}_3\text{N}_4^*) = (k_1 - K_1 k_{-1}) c(^1\text{g-C}_3\text{N}_4) c(\text{H}_2\text{O}) c(\text{CO}_2) \quad (13)$$

For  $\text{H}_2\text{O}_2$ :

$$dc(\text{H}_2\text{O}_2)/dt = k_8 c(\text{OH}\cdot)^2 - k_9 c(\text{H}_2\text{O}_2) + k_{-9} c(\text{O}_2)^{1/2} c(\text{H}_2\text{O}) = 0 \quad (14)$$

For the equilibrium between  $\text{H}_2\text{O}_2$  and  $\text{O}_2$ :

$$k_9 c(\text{H}_2\text{O}_2) = k_{-9} c(\text{O}_2)^{1/2} c(\text{H}_2\text{O}) \quad (15)$$

Substitute (15) into (14):

$$k_8 c(\text{OH}\cdot)^2 = (k_9/K_9 - k_{-9}) c(\text{O}_2)^{1/2} c(\text{H}_2\text{O}) \quad (16)$$

Substitute (8) and (11) into both sides of (1):

$$-k_2 K_1 K_2 c(^1\text{g-C}_3\text{N}_4) dc(\text{H}_2\text{O}) dc(\text{CO}_2)/dt = (k_6/K_6 - k_{-6}) c(^3\text{g-C}_3\text{N}_4^*) c(\text{OH}\cdot)^2 c(\text{CO})$$

Then,

$$-dc(\text{H}_2\text{O}) dc(\text{CO}_2)/dt = (k_6/K_6 - k_{-6})/K_1 K_2 k_2 c(^3\text{g-C}_3\text{N}_4^*) c(\text{OH}\cdot)^2 c(\text{CO})/c(^1\text{g-C}_3\text{N}_4) \quad (17)$$

(The concentration of the catalyst  $c(^1\text{g-C}_3\text{N}_4)$  is constant)

Substitute (13) into (17):

$$-dc(\text{H}_2\text{O}) dc(\text{CO}_2)/dt = (k_1/K_1 - k_{-1})(k_6/K_6 - k_{-6})/K_2 k_2 k_7 c(\text{CO}) c(\text{H}_2\text{O}) c(\text{CO}_2) c(\text{OH}\cdot)^2 \quad (18)$$

Then,

$$-dc(\text{CO}_2)/dt = (k_1/K_1 - k_{-1})(k_6/K_6 - k_{-6})/K_2 k_2 k_7 c(\text{CO}) c(\text{CO}_2) c(\text{OH}\cdot)^2$$

(The concentration of  $\text{H}_2\text{O}$  ( $c(\text{H}_2\text{O})$ ) is a constant)

Substitute (16) into (18):

$$-dc(\text{CO}_2)/dt = (k_1/K_1 - k_{-1})(k_6/K_6 - k_{-6})(k_9/K_9 - k_{-9})/K_2 k_2 k_7 k_8 c(\text{CO}) c(\text{CO}_2) c(\text{H}_2\text{O}) c(\text{O}_2)^{1/2} \quad (19)$$

Combined  $c(\text{CO}_2)$  and  $c(\text{H}_2\text{O})$  into the constant term:

$$-dc(\text{CO}_2)/dt = k' c(\text{CO}) c(\text{O}_2)^{1/2}$$

The CO<sub>2</sub>RR is a first order reaction for the product CO.

**References** 1 Y. L. Niu, Q. Peng, C. M. Deng, X. Gao and Z. G. Shuai, *J. Phys. Chem. A*, 2010, **114**, 7817–7831. 2 Q. Peng, Y.P. Yi, Z.G. Shuai and J.S. Shao, *J. Am. Chem. Soc.*, 2007, **129**, 9333–9339. 3 Y.L. Niu, Q. Peng and Z.G. Shuai, *Sci. China, Ser. B*, 2008, **51**, 1153–1158.  
4 Q. Peng, Y.L. Niu and Q. H. Shi, *J. Chem. Theory. Comput.*, 2013, **9**, 1132–1143.
